# Supplementary material for: KDM8/JMJD5 as a dual coactivator of AR and PKM2 integrates AR/EZH2 network and tumor metabolism in CRPC
Source: PubMed Central journal article supplement (PMC6755995; doi:10.1038/s41388-018-0414-x), 2018-08-02
Supplement: 41388_2018_414_MOESM10_ESM.pdf [file 41388_2018_414_MOESM10_ESM.pdf]

**PR952 (total 48 cases, 40 adenocarcinomas)**

---

|                                  | <b>KDM8 IHC Score</b> |              |              | <i>p</i> value* |
|----------------------------------|-----------------------|--------------|--------------|-----------------|
|                                  | <b>0 - 1</b>          | <b>2 - 3</b> | <b>total</b> |                 |
| <b>Adenocarcinomas</b>           |                       |              |              |                 |
| <b>Gleason score 2-6:</b>        | <b>2</b>              | <b>1</b>     | <b>3</b>     |                 |
| <b>7-10:</b>                     | <b>8</b>              | <b>27</b>    | <b>35</b>    | <b>0.164</b>    |
| <b>Normal adjacent to tumor:</b> | <b>7</b>              | <b>1</b>     | <b>8</b>     |                 |

---

**PR751 (total 73 scorable cases, 63 adenocarcinomas)**

---

|                           | <b>KDM8 IHC Score</b> |              |              | <i>p</i> value** |
|---------------------------|-----------------------|--------------|--------------|------------------|
|                           | <b>0 - 1</b>          | <b>2 - 3</b> | <b>total</b> |                  |
| <b>Adenocarcinomas</b>    |                       |              |              |                  |
| <b>Gleason score 2-6:</b> | <b>27</b>             | <b>8</b>     | <b>35</b>    |                  |
| <b>7-10:</b>              | <b>7</b>              | <b>21</b>    | <b>28</b>    | <b>&lt;0.001</b> |
| <b>Hyperplasia:</b>       | <b>6</b>              | <b>4</b>     | <b>10</b>    |                  |

---

\* by Fisher's exact test; \*\* by chi-square test.
